1 **A novel benchmark for COVID-19 pandemic testing effectiveness enables the**  
2 **accurate prediction of new Intensive Care Unit admissions**

3 Dimitris Nikoloudis<sup>1\*</sup>, Dimitrios Kountouras<sup>1</sup> and Asimina Hiona<sup>1</sup>

4 <sup>1</sup> Center for Preventive Medicine & Longevity, Bioiatriki Healthcare Group, 11525 Athens,  
5 Greece

6 \*Corresponding author

7

8 **Abstract**

9 The positivity rate of testing is currently used both as a benchmark of testing adequacy and for assessing  
10 the evolution of the COVID-19 pandemic. However, since the former is a prerequisite for the latter, its  
11 interpretation is often conflicting. We propose as a benchmark for COVID-19 testing effectiveness a new  
12 metric, termed 'Severity Detection Rate' (SDR), that represents the daily needs for new Intensive Care  
13 Unit (ICU) admissions, per 100 cases detected (t-i) days ago, per 10,000 tests performed (t-i) days ago.  
14 Based on the announced COVID-19 monitoring data in Greece from May 2020 until August 2021, we  
15 show that beyond a certain threshold of daily tests, SDR reaches a plateau of very low variability that  
16 begins to reflect testing adequacy. Due to the stabilization of SDR, it was possible to predict with great  
17 accuracy the daily needs for new ICU admissions, 12 days ahead of each testing data point, over a period  
18 of 10 months, with Pearson  $r = 0.98$  ( $p = 10^{-197}$ ), RMSE = 7,16. We strongly believe that this metric will  
19 help guide the timely decisions of both scientists and government officials to tackle pandemic spread  
20 and prevent ICU overload by setting effective testing requirements for accurate pandemic monitoring.  
21 We propose further study of this novel metric with data from more countries to confirm the validity of  
22 the current findings.

23

24

25

26

27

28

29

## 30 **Introduction**

31

32           Although no country knows at any point the true total number of COVID-19 cases, it is crucial for  
33 public health administrations to be confident that the daily testing performed is stably representative of  
34 that number. Effective testing provides health professionals and officials with a clear picture of SARS-  
35 CoV-2 spread within the community, as well as of the dynamics of COVID-19 pathology, and guides them  
36 for prompt and adequate interventions towards containment of the pandemic at the local and national  
37 levels.

38           The percentage of tests that return a positive result, also known as the “positivity rate”, is an  
39 important outcome of testing that is used both as a benchmark for testing adequacy and as a metric for  
40 assessing the current spread of the virus<sup>1,2</sup>. However, this dual usage presents an inherent drawback in  
41 entrusting the metric in any one of two possible ways: is a high positivity rate due to a high number of  
42 infected individuals, or due to a low number of tests performed? A rule of thumb says that a positivity  
43 rate of 5% is too high, and the WHO suggests that the positivity rate should rest below that threshold for  
44 a length of at least two weeks before officials decide to progressively reopen professional and social  
45 activities<sup>1</sup>. Another evidence-based perception suggests that the positivity rate must remain below 3%  
46 to ensure that surveillance is broad and accurate enough<sup>2</sup>. However, these rules may only cover either  
47 the virus spread surveillance criterion or that of testing adequacy, not both. Indeed, officials often  
48 respond to a high positivity rate both with an increase in testing and with measures to restrict virus  
49 transmission, such as social distancing and soft or hard lockdowns. But by doing so, it is expectedly hard  
50 to timely assess the true rate of the virus spreading out, or being contained, as the new higher levels of  
51 testing must be stabilized for a length of time before allowing again to reliably follow the pandemic  
52 dynamics. In such a scenario, if health officials rely only on the positivity rate metric, the timing of the  
53 response would lag and thus be almost invariably suboptimal.

54           Fundamentally, a metric that would serve as a benchmark for the effectiveness of COVID-19  
55 testing should not concurrently be used for assessing the evolution of the pandemic, as the former is a

56 prerequisite for the latter and therefore the interpretation would be conflicting; indeed, the health  
57 administrations of a country should be confident that a sufficient number of tests is performed to  
58 effectively track the virus spread. However, if such a metric also implemented measurable outcomes of  
59 the pandemic in the community (e.g., number of deaths, number of ICU admissions, etc.), they could  
60 introduce by their more factual nature a link between expectation and actuality, since the outcomes of  
61 COVID-19 are inherently tied to the virus's pathogenesis. Therefore, such a link could, in theory,  
62 introduce a benchmarkable step of convergence towards a soft cap (threshold) that would in turn reflect  
63 testing adequacy, e.g., usually a maximized or minimized value, or a state of minimized variation. In this  
64 report, we present an easy-to-implement metric that we developed while independently monitoring  
65 and analyzing COVID-19 pandemic evolution in Greece, which considers outcomes that are already  
66 monitored in most countries, such as the daily numbers of human losses, COVID-19 patients in the ICU  
67 (Intensive Care Units), and patients who are being discharged from the ICU. In our example we show  
68 that this metric displays remarkable output stability when a certain threshold of daily testing is reached,  
69 which to our view clearly reflects testing adequacy. Furthermore, we validated its benchmarking  
70 efficiency by forecasting, not only with high accuracy but also great precision, the total daily needs for  
71 new ICU admissions, roughly two weeks in advance, over a period of 10 months.

72

## 73 **Methods**

74

75 The national monitoring data for the evolution of the COVID-19 pandemic in Greece were  
76 retrieved from the Hellenic National Public Health Organization<sup>3</sup> and Greek Government's official daily  
77 announcements<sup>4</sup>. Specifically, the daily official announcements included the following parameters: (a)  
78 number of new COVID-19 cases detected, (b) number of deaths due to COVID-19, (c) total number of  
79 COVID-19 ICU patients, (d) total number of COVID-19 patients discharged from ICU, (e) total number of  
80 SARS-CoV-2 PCR tests performed<sup>5</sup>, and (f) total number of SARS-CoV-2 rapid antigen tests performed<sup>6</sup>.

81 Based on the available data, we defined *the daily needs for new COVID-19 ICU admissions* as  
82 number U:

$$83 \quad U = (x_0 - x_{t-1}) + d + e \quad (1)$$

84 where:

- 85 - Today's deaths due to COVID-19:  $d$
- 86 - Today's number of COVID-19 patients discharged from ICU:  $e$
- 87 - Today's total number of COVID-19 ICU patients:  $x_0$
- 88 - Yesterday's total number of COVID-19 ICU patients:  $x_{t-1}$

89 This number  $U$  represents the actual daily new COVID-19 ICU admissions, plus those patients who died  
90 in the community (not in ICU), whom we theorize to have required ICU admission, hence the definition  
91 of *the daily needs for new COVID-19 ICU admissions*.

92

93 Next, we defined as the Severity Detection Rate with a time lag ( $t-i$ ) ( $SDR_i$ ), a metric that  
94 represents the percentage of patients who require ICU admission, per new cases, detected ( $t-i$ ) days  
95 ago, per 10,000 tests, performed ( $t-i$ ) days ago:

$$96 \quad SDR_i = (U * 100 / c_{t-i}) / (n_{t-i} / 10,000) \Rightarrow \quad SDR_i = U * 1,000,000 / (c_{t-i} * n_{t-i}) \quad (2)$$

97 where:

- 98 - Today's rolling 7-day average of new daily needs for COVID-19 ICU:  $U$
- 99 - Rolling 7-day average of detected COVID-19 cases, ( $t-i$ ) days ago:  $c_{t-i}$
- 100 - Rolling 7-day average of total number of COVID-19 tests, ( $t-i$ ) days ago:  $n_{t-i}$

101

102 Tests in Greece were performed freely by any individual who wanted to get tested, in selected  
103 hospitals, or in most private diagnostic centers and clinics, or in mobile testing hubs, dispatched by the  
104 public healthcare administration. Also, an individual may get tested in regular intervals (*e.g.*, up to twice  
105 per week), as requested by their employer or the administration, due to the nature of their profession.  
106 To the best of our knowledge, only one swab is taken from the individual per test, in Greece.  
107 Furthermore, the reported COVID-19 cases detected, and daily tests performed, are used for the official  
108 calculation of positivity rate, announced routinely by the country's healthcare administration<sup>3</sup>; if  
109 multiple tests per individual were simply added to the total daily number, this would constitute a  
110 systematic error in the calculation of positivity rate. Therefore, for the reasons explained above, for this  
111 analysis, the daily number of tests reported publicly is presumed to represent unique individuals.

112 For initial data exploration, the lag of Severity Detection Rate (SDR) metrics was set to 14 days,  
113 which means that the current day's critical outcomes of COVID-19 (*i.e.*, ICU admission or death in the  
114 community) were attributed to COVID-19 cases detected 14 days ago. For the identification of the  
115 optimal lag point between the critical outcomes of COVID-19 and the detected cases, we searched  
116 within an interval between 7 to 21 days, in the period 17/10/20 to 31/1/21 of the dataset, for the most  
117 stable correlation between the numerator (number U) and the denominators ( $[cases_{t-i} * tests_{t-i}]$ ) of the  
118 metrics studied. The best correlation was obtained for a lag of 12 days ( $i=12$ ) (see Discussion section)  
119 and therefore, for consistency, all charts and tables reflect this optimal time lag ( $i=12$ ).

120

121 Finally, for completeness of the study, we also defined as ICU admission Rate with a time lag ( $t-i$ )  
122 (henceforth "ICU Rate",  $IR_i$ ), a metric that represents the percentage of patients who require ICU  
123 admission, per new cases, detected ( $t-i$ ) days ago:

$$124 \quad IR_i = U * 100 / c_{t-i} \quad (3)$$

125 where:

- 126 - Today's rolling 7-day average of new daily needs for COVID-19 ICU: U
- 127 - Rolling 7-day average of detected COVID-19 cases, ( $t-i$ ) days ago:  $c_{t-i}$

128

129 IR metric is essentially a simpler form of the SDR metric, which doesn't take into account the number of  
130 daily tests performed. As we wanted to also evaluate its predictive performance, we doubled every  
131 piece of analysis performed on the SDR metric, on the IR metric as well. The related charts and tables  
132 are not part of the Results section in favor of clarity for the main metric presented (SDR), but are,  
133 nonetheless, commented upon in the Discussion section.

134

135 The dataset was locked on August 8<sup>th</sup> 2021.

136

137

138

139

140

141

## 142 Results

143 For observation, the daily evolution of  $SDR_{12}$ , from the 7<sup>th</sup> of May 2020 onwards, was traced on  
144 the same chart versus the observed number of daily ICU needs, the positivity rate and the corresponding  
145 number of testing samples (Figure 1).

146

147

148

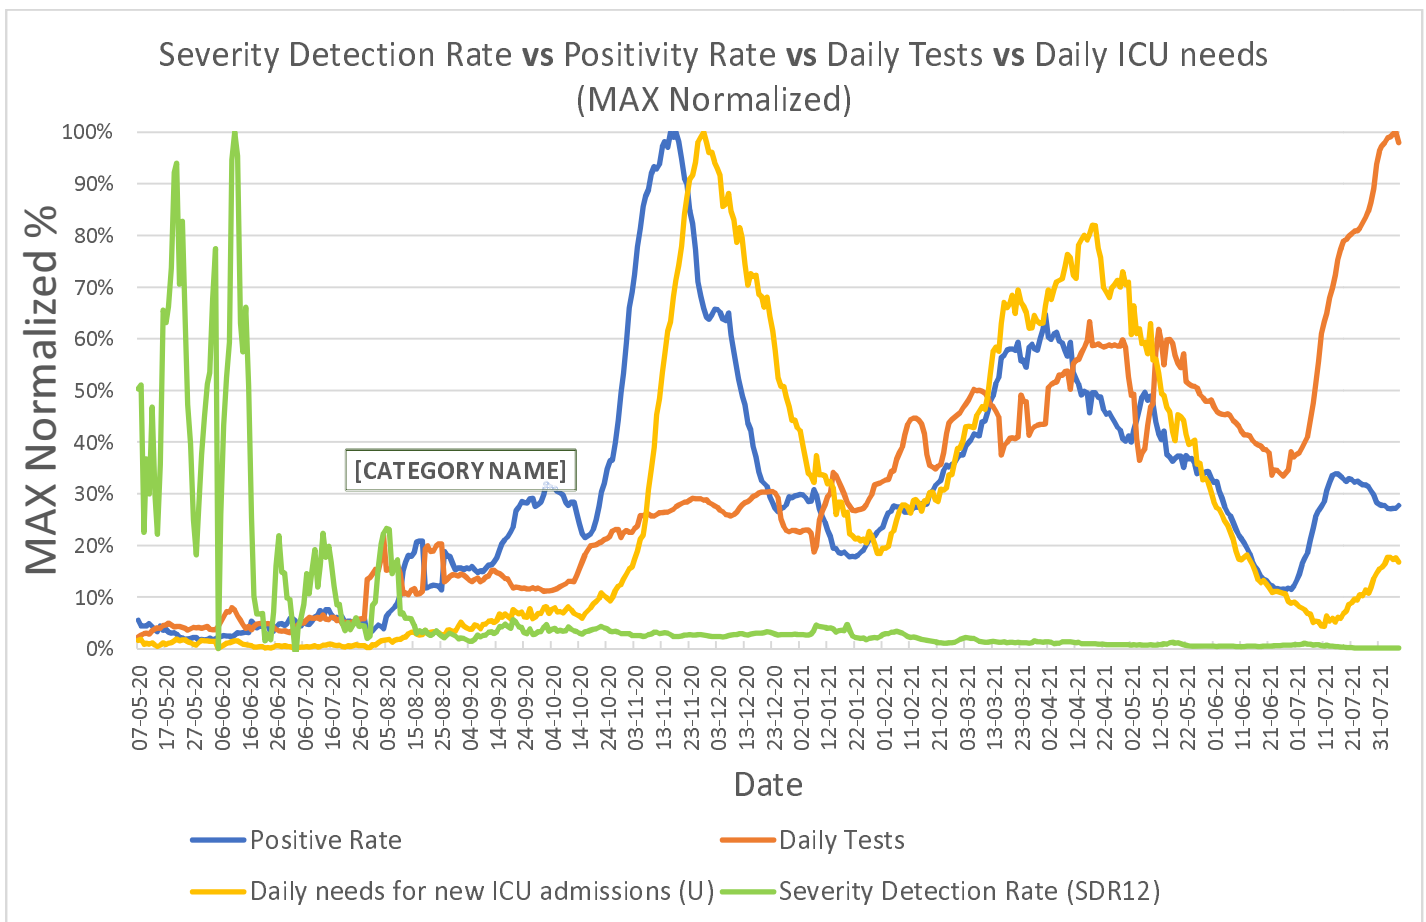

150 **Figure 1.** Comparison of trendlines of Severity Detection Rate, Daily needs for new ICU admissions,  
151 Positivity rate, and number of Daily Tests, in the period from 7/5/2020 to 8/8/2021. The Daily needs for  
152 new ICU admissions and the number of Daily Tests represent rolling 7-day averages. Severity Detection  
153 Rates and Positivity Rates were calculated from the rolling 7-day averages of their components. All  
154 numbers were normalized by their maximum value in the examined period.

155

156 Compared to the other quantities, the SDR metric shows a remarkable stabilization past the time mark  
157 on approximately 20/8/2020, which also corresponds to the attainment of an average daily testing  
158 number of 10,000/day. From that point forward, the observed daily ICU needs, the positivity rate and  
159 the testing rate continue to fluctuate independently and considerably, but without accordingly  
160 perturbing SDR stabilization.

161

162

163 The rate of daily testing in Greece has been scaled up significantly on four occasions,  
164 approximately (a) on 29/7/2020, (b) on 17/10/2020, (c) on 1/2/2021 and (d) on 11/7/2021. As the new  
165 testing levels were preserved after each scale-up, it is possible to define 5 distinct periods of testing  
166 intensity thus far during the COVID-19 pandemic in Greece. Interestingly, a sixth distinct period is noted  
167 between 1/5/2021 and 10/7/2021, where, inversely, a steady reduction in the number of daily tests is  
168 observed, although the daily average number of tests is preserved from the immediately previous  
169 period. We qualified this behavior as noteworthy and chose to study the respective period separately.  
170 We therefore characterized the SDR number and the rates of testing for each of the following time  
171 intervals: (i) 1/5/2020 - 28/7/2020, (ii) 29/7/2020 – 16/10/2020, (iii) 17/10/2020 – 31/1/2021, (iv),  
172 1/2/2021 – 30/4/2021, (v) 1/5/2021 – 10/7/2021, and (vi) 11/7/2021 – 8/8/2021 (Table 1).

173

174

175

176

177

178  
179  
180  
181  
182  
183

**Table 1.** *Characterization of the Severity Detection Rate and the number of daily tests for each of the six time intervals of distinct testing levels in Greece.*

| Distinct periods of testing levels |                      |         |                        |         |                        |         |
|------------------------------------|----------------------|---------|------------------------|---------|------------------------|---------|
| intervals                          | 1/5/2020 - 28/7/2020 |         | 29/7/2020 – 16/10/2020 |         | 17/10/2020 - 31/1/2021 |         |
|                                    | SDR <sub>12</sub>    | Samples | SDR <sub>12</sub>      | Samples | SDR <sub>12</sub>      | Samples |
| max                                | 92.0%                | 7309    | 7.0%                   | 20310   | 3.2%                   | 31602   |
| average                            | 20.1%                | 4051    | 2.7%                   | 12861   | 2.1%                   | 24377   |
| median                             | 14.3%                | 3992    | 2.6%                   | 12453   | 2.0%                   | 24743   |
| min                                | 0.1%                 | 1400    | 1.1%                   | 9706    | 1.3%                   | 17315   |
| sd                                 | 19.6%                | 1260    | 1.0%                   | 2439    | 0.4%                   | 3172    |
| cv                                 | 0.97                 | 0.31    | 0.36                   | 0.19    | 0.19                   | 0.13    |
| intervals                          | 1/2/2021 - 30/4/2021 |         | 1/5/2021 - 10/7/2021   |         | 11/7/2021 - 27/7/2021  |         |
|                                    | SDR <sub>12</sub>    | Samples | SDR <sub>12</sub>      | Samples | SDR <sub>12</sub>      | Samples |
| max                                | 1.6%                 | 58578   | 1.0%                   | 57206   | 0.12%                  | 76262   |
| average                            | 0.9%                 | 42905   | 0.4%                   | 42150   | 0.11%                  | 69974   |
| median                             | 0.9%                 | 41906   | 0.4%                   | 41922   | 0.11%                  | 73005   |
| min                                | 0.5%                 | 29504   | 0.2%                   | 30871   | 0.10%                  | 58583   |
| sd                                 | 0.3%                 | 7510    | 0.2%                   | 7190    | 0.01%                  | 5919    |
| cv                                 | 0.32                 | 0.18    | 0.36                   | 0.17    | 0.06                   | 0.08    |

184  
185

186 Tripling the average daily rate of testing (from 4K to 12K) in the second (ii) interval brought a 7-fold  
187 lower average value of SDR (20.1% / 2.7% ~ 7.4), with a remarkable 20-fold decrease (19.6% / 1%) in the  
188 Standard Deviation (SD) of SDR, and a concomitant 3-fold decrease in the CV (Coefficient of Variation) of  
189 SDR (0.97/0.36 ~ 2.7). Further doubling of the average daily number of tests (from 12 K to 24 K) in the  
190 third (iii) interval again brought an equivalent decrease in the SDR SD (1.0% / 0.4% = 2.5) although the  
191 average value of SDR was now only moderately diminished by approximately 30% (2.7% / 2.1% ~ 1.29),  
192 indicating a tendency towards stabilization of the SDR value and a continuous reduction of the Standard



193 Deviation (SD). Overall, it is noteworthy that specifically the average and SD values of SDR continued to  
194 drop consistently in all 6 periods.

195

196 We then traced the values of SDR metric against the daily number of tests. The SDR values display a  
197 strong correlation with the daily number of tests, employing power regression (Spearman  $r = -0.90$ ,  $p =$   
198  $10^{-167}$ ,  $N = 451$ ) and suggest that beyond a threshold of daily tests performed, SDR becomes significantly  
199 stabilized (Figure 2); for Greece, this stabilization begins once the number of daily tests exceeds the  
200 mark of 10,000 per day.

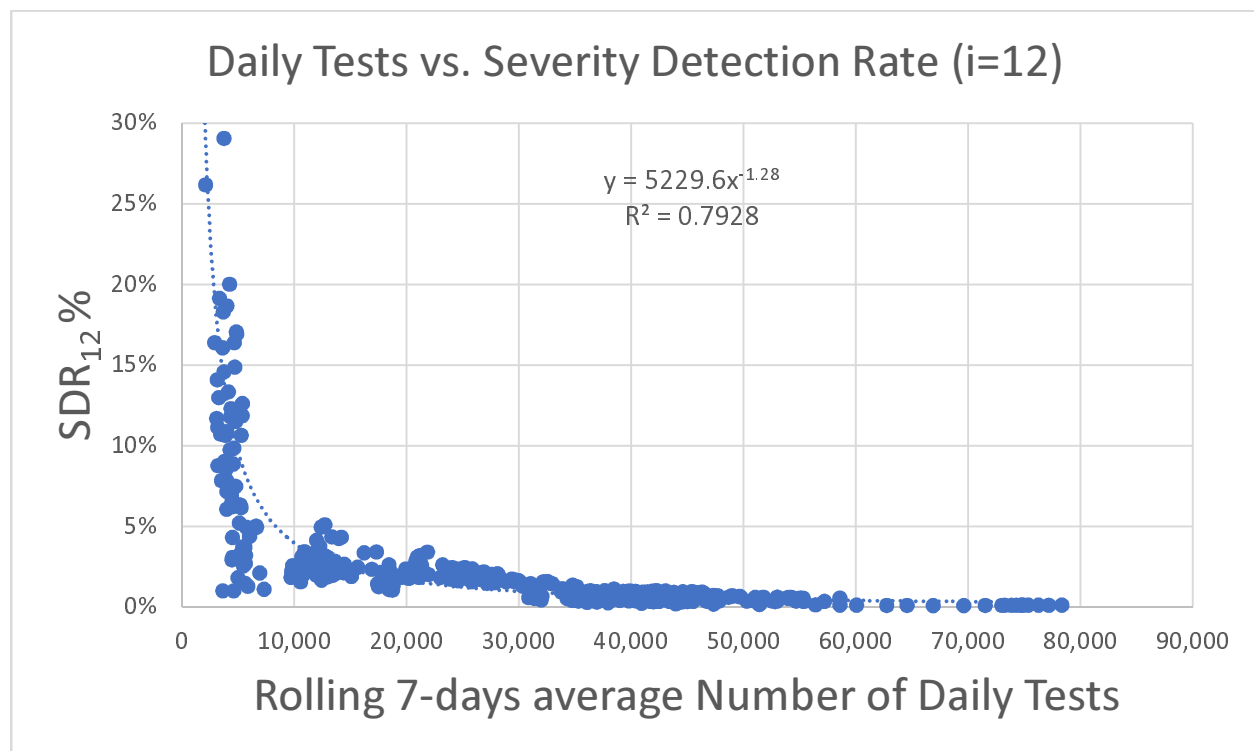

201

202 **Figure 2.** Correlation between the Severity Detection Rate and rolling 7-day averages of the number of  
203 daily tests, with Spearman  $r = -0.90$ ,  $p = 10^{-167}$ ,  $N = 451$ . Numbers of daily tests derived from the period  
204 from 15/5/2020 to 8/8/2021.

205

206 The next step was to study the correlation between the numerator (number U) and the  
207 denominator ( $[\text{cases}_{t-i} * \text{tests}_{t-i}]$ ) of SDR metric, for the period 17/10/2020 to 8/8/2021 (Figure 3). The  
208 starting period was chosen to be the same as the start of testing period (iii) (Table 1). Before that date,

209 both the numbers of new daily needs for ICU and daily cases were relatively low (Figure 1) and therefore  
210 of smaller interest to the specific study, *i.e.*, when added to the rest of the data, the respective  
211 correlation is innately stronger due to the near-baseline nature of the data points prior to 17/10/2020.  
212

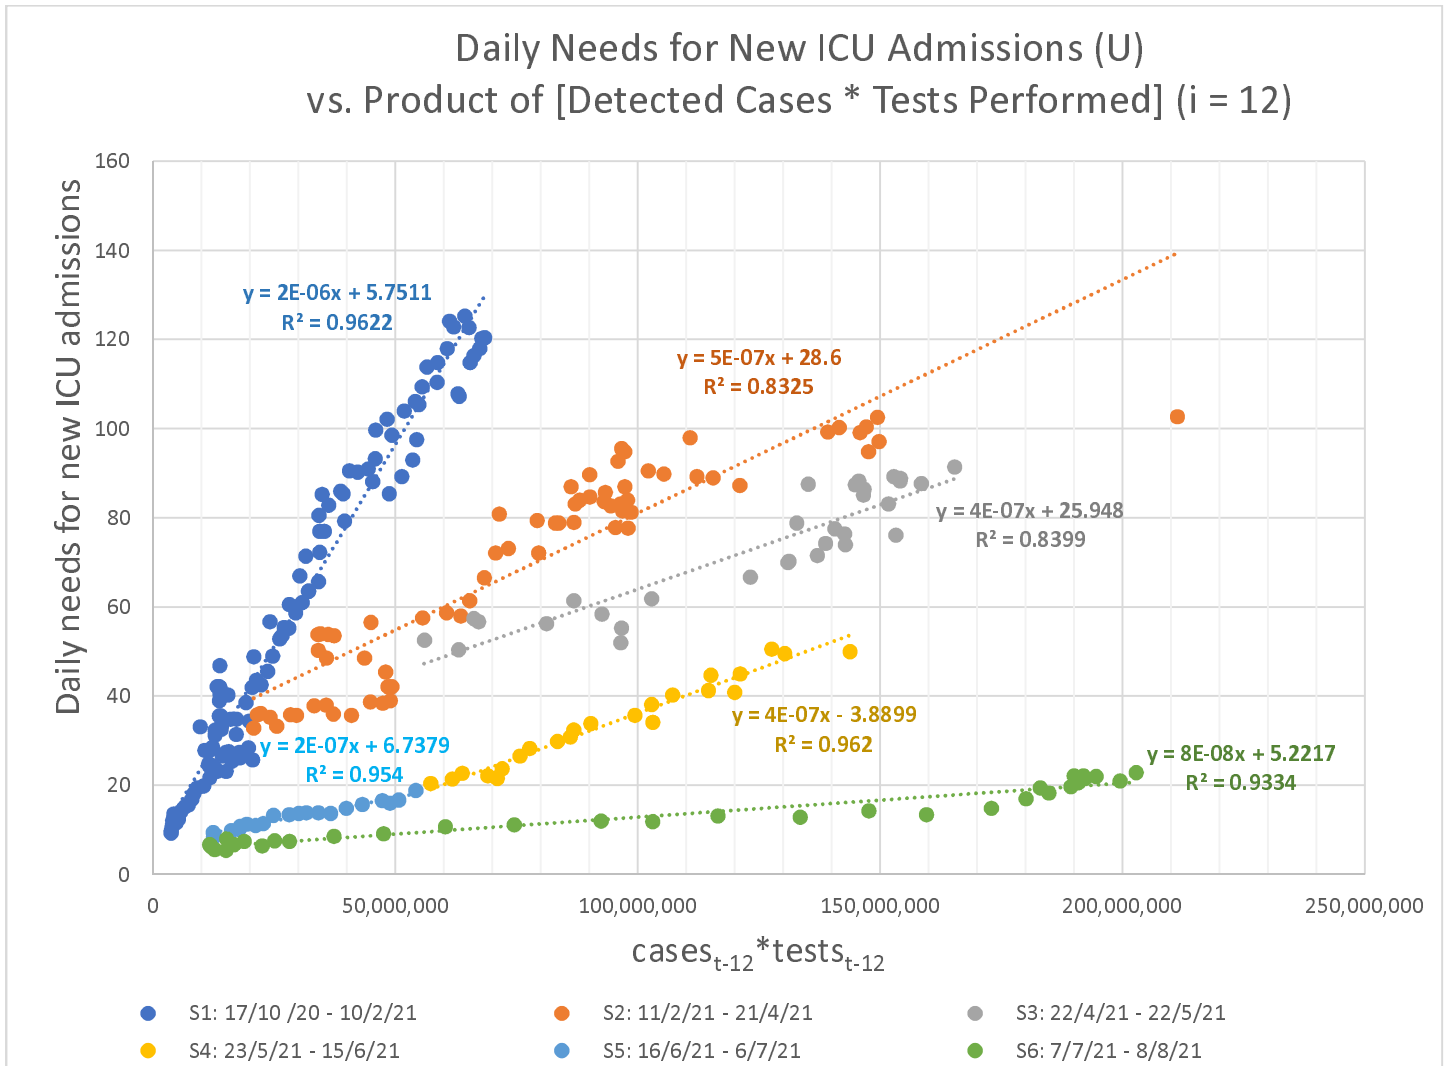

214 **Figure 3.** Correlation of the numerator and denominator of SDR, *i.e.*, number U versus the product  
215 ( $\text{cases}_{t-12} * \text{tests}_{t-12}$ ), with a lag of 12 days. Numbers of daily tests and detected cases were derived from  
216 the period from 17/10/2020 to 8/8/2021.

217

218

219  
220  
221  
222  
223  
224  
225  
226  
227  
228  
229  
230  
231  
232  
233  
234  
235  
236  
237  
238  
239  
240  
241  
242  
243  
244

Finally, we applied the linear regression equations to forecast the rolling 7-day average daily needs for new ICU admissions, 12 days ahead of each data point of daily announced cases and tests, for the corresponding periods, *i.e.*, from 17/10/2020 to 8/8/2021. The forecast employing the SDR regression equations (Figure 3) proved very accurate (Pearson  $r = 0.98$ ,  $p = 10^{-197}$ , RMSE = 7.16; with  $n = 296$ , observed  $U[\text{max}] = 125$ ,  $U[\text{average}] = 51$ ) (Figure 4). Expectedly, as can be noticed in Figure 4B, most of the few intense discrepancies in the fitted values are observed around dates of transition from one regression equation to another; a rolling regression window could possibly help improve the forecast of even these phases. Overall, forecasting with the use of Severity Detection Rate proved to be functional as it indicated a very strong agreement between the predicted and observed values for a period of nearly 10 months, which included the two major pandemic waves in the country, thus far.

245

246 **A**

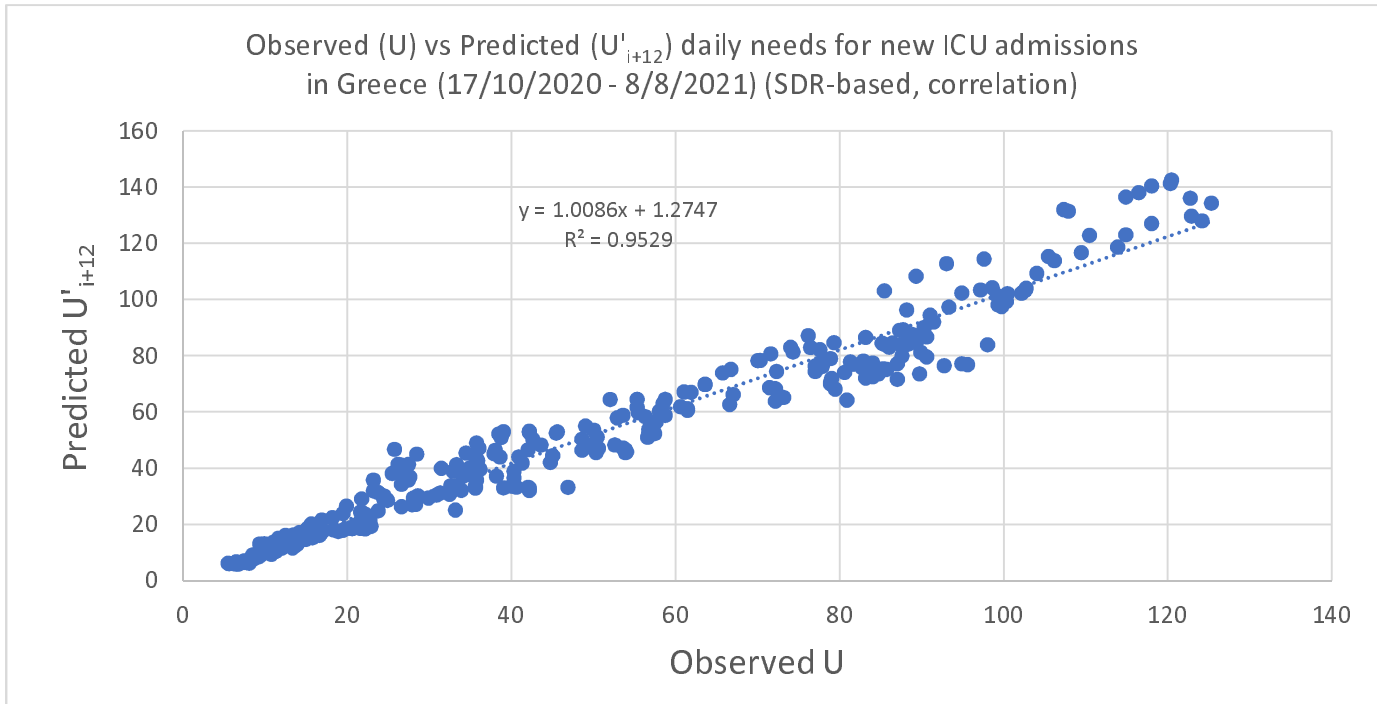

248 **B**

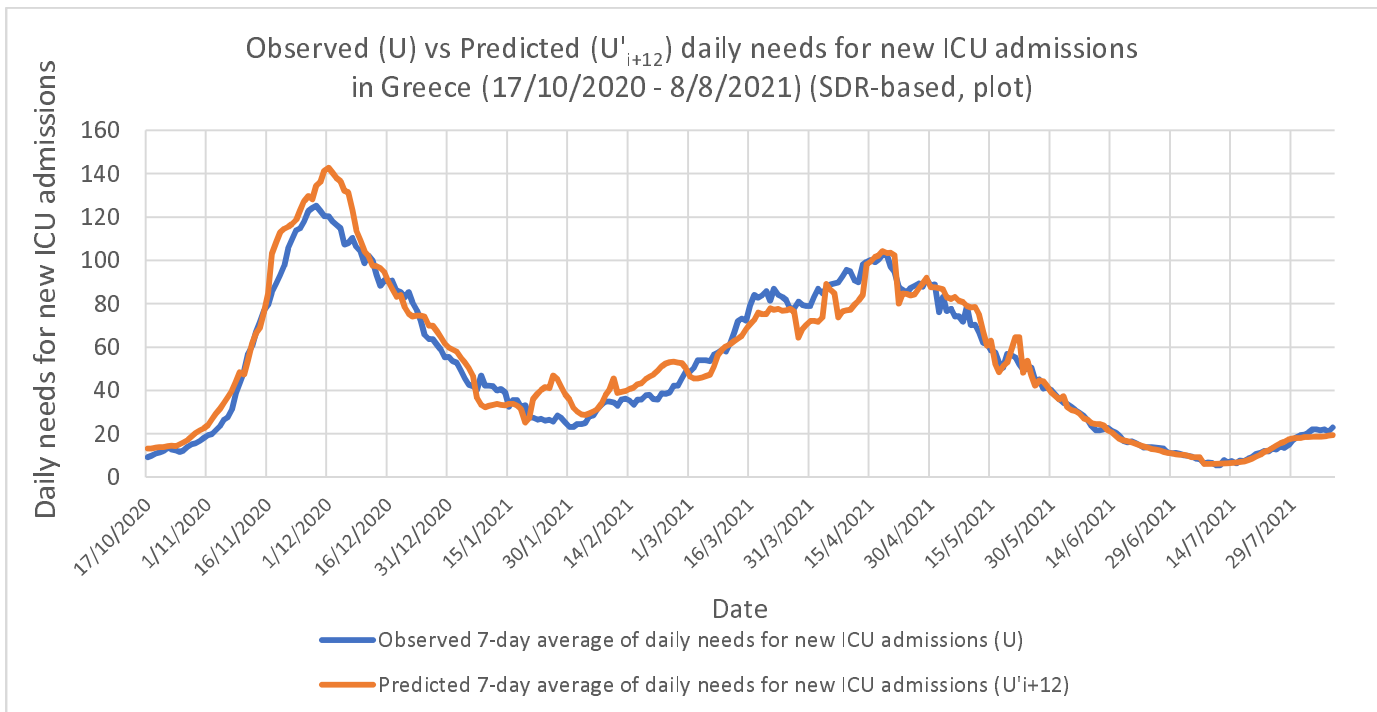

250

251 **Figure 4.** (A) *Correlation between observed and predicted daily needs for new ICU admissions for the*  
252 *period between 17/10/2020 and 8/8/2021 employing Severity Detection Rate regression equations, with*  
253 *Pearson  $r = 0.98$ ,  $p = 10^{-197}$ , RMSE = 7.16; with  $n = 296$ , observed  $U[\text{max}] = 125$ ,  $U[\text{average}] = 51$ . (B) *The*  
254 *respective time-series plots for visual inspection of the fit.**

255

256

## 257 Discussion

258

259 We have shown that beyond a threshold of daily tests performed, SDR reaches a plateau that  
260 displays very low variation. This threshold appears roughly around the 10,000 daily samples mark in  
261 Greece, a country of approximately 11 million people, but this number is expected to vary greatly from  
262 country to country depending on the total population, rural density, societal particularities, population  
263 immune profile, and sampling strategies<sup>7</sup>. Reaching that threshold should not mean that there is no  
264 need for further increase in the number of daily tests, as it is strongly suggestive that the more tests a  
265 country performs, the more informative the results are about the actual viral spread in the community,  
266 and consequently health administrations are in better position to respond accordingly. In terms of the  
267 SDR metric, more daily tests appear to further decrease its variation (Table 1). The weaker its variation,  
268 the stronger the correlation coefficient between *the numerator and denominator of SDR, i.e., number  $U$*   
269 *versus the product ( $\text{cases}_{t-i} * \text{tests}_{t-i}$ ), and therefore, the more accurately we can predict the number of*  
270 *daily needs for new ICU admissions,  $t+i$  days in advance. In the studied example, predictions were highly*  
271 *accurate with an average daily number of tests as high as 24,000 (Table 1), which resulted in a SD of the*  
272 *SDR of 0.4%. As the SD of the SDR showed a consistent decrease over a period of 15 months in our*  
273 *studied example (Table 1), we propose it can possibly act as an actual numerical threshold that denotes*  
274 *the attainment of the SDR plateau.*

275 As a direct consequence of this potential predictability, when SDR establishes a plateau, we  
276 consider that the bulk of daily tests is returning a set of positive cases that is stably representative of the  
277 current spread of the virus. Therefore, the SDR metric constitutes a benchmark of testing effectiveness.

278 The metric is potentially efficient at a local level as well, if cases that require delocalization, *e.g.*, due to  
279 lack of available ICU locally, are effectively tracked and taken into account. As the full segmentation of  
280 the necessary data was not available at a local level for the present study, it was not possible to evaluate  
281 the effects of viral spread uniformity across the country and, more specifically, the metric's behavior  
282 due to disproportionate testing intensities locally, *e.g.*, higher number of tests in districts with lower  
283 viral load, and relatively lower numbers of daily tests in districts with higher true viral load. In such a  
284 case, it would be helpful to apply the SDR monitoring at a local level.

285 The metric's median value is expected to decrease monotonically and with decreasing variation  
286 as daily tests increase, or due to the gradual containment of the virus, immunization of the population,  
287 thanks to an efficient vaccination program, improvement of therapeutic protocols that reduce the  
288 number of very severe cases, or even a significant reduction in the average age of infected individuals  
289 due to the efficient protection of the elderly. Conversely, the metric's median value may increase  
290 (interrupting the plateau) if the viral spread becomes greatly enhanced with time, *e.g.*, due to the  
291 prevalence of a new more infectious variant<sup>8,9,10</sup>, without the testing levels catching up. In such a case  
292 the SDR's median will increase disproportionately and beyond its expected variability.

293 In order to comprehend the nontrivial nature of the plateau attainment and retainment in the  
294 plot of SDR versus the number of daily tests (Figure 2), it is useful to look more carefully at some notable  
295 boundaries of the SDR metric. For instance, if it was possible to test the entire population every day for  
296 newly infected individuals (minus the individuals that are already known to be infected), then the  
297 "discovery" of every new infection case would be guaranteed (assuming 100% accurate tests). With a  
298 number of daily tests as big as the entire population and with the highest possible number of detected  
299 cases (*i.e.*, equal to the actual cases), the SDR value becomes  $[ U / ((\text{actual new cases}) * \text{population}) ]$   
300 with the denominator assuming its greatest possible value, hence producing the lowest possible SDR.

301 In a different approach that hypothetically guarantees the detection of all the actual new  
302 infected cases (without testing the entire population), we can consider testing all the newly infected  
303 individuals, and only them, so that the number of daily tests becomes equals to the number of new  
304 infections (again, assuming 100% testing accuracy). In this case the SDR value becomes  $[ U / (\text{actual cases}$   
305  $* \text{actual cases}) = U / \text{actual cases}^2 ]$ . Whether the possible values of the SDR metric can be bigger or  
306 smaller than the value obtained in this second hypothetical scenario, depends on whether the product  
307  $[\text{cases}_{t-i} * \text{tests}_{t-i}]$  is smaller or bigger than the square of the number of actual new infection cases (see  
308 mathematical demonstration, below). Finally, as the theoretical maximum of all the possible SDR values

309 we may consider the case where the denominator  $[\text{cases}_{t-i} * \text{tests}_{t-i}]$  is equal to 1, and therefore SDR  
 310 would be equal to number U. Specifically:

311

$$312 \quad U/(\alpha_{t-i} * \text{population}) \leq \text{SDR} \leq U/\alpha_{t-i}^2 \leq \text{SDR}' \leq U \quad \Rightarrow$$

$$313 \quad U/(\alpha_{t-i} * \text{population}) \leq U/(\text{cases}_{t-i} * \text{tests}_{t-i}) \leq U/\alpha_{t-i}^2 \leq U/(\text{cases}_{t-i}' * \text{tests}_{t-i}') \leq U \quad \Rightarrow$$

$$314 \quad 1/(\alpha_{t-i} * \text{population}) \leq 1/(\text{cases}_{t-i} * \text{tests}_{t-i}) \leq 1/\alpha_{t-i}^2 \leq 1/(\text{cases}_{t-i}' * \text{tests}_{t-i}') \leq 1 \quad (4)$$

315 therefore:

$$316 \quad (\text{cases}_{t-i} * \text{tests}_{t-i}) \leq \alpha_{t-i} * \text{population} \quad (5)$$

$$317 \quad (\text{cases}_{t-i} * \text{tests}_{t-i}) \geq \alpha_{t-i}^2 \quad \Rightarrow \quad \forall (\text{cases}_{t-i} * \text{tests}_{t-i}) \geq \alpha_{t-i} \quad (6)$$

$$318 \quad (\text{cases}_{t-i}' * \text{tests}_{t-i}') \leq \alpha_{t-i}^2 \quad \Rightarrow \quad \forall (\text{cases}_{t-i}' * \text{tests}_{t-i}') \leq \alpha_{t-i} \quad (7)$$

319 where:

- 320 - Today's rolling 7-day average of new daily needs for COVID-19 ICU: U
- 321 - The actual new cases, (t-i) days ago:  $\alpha_{t-i}$
- 322 - Severity Detection Rate at plateau: SDR
- 323 - Severity Detection Rate outside the plateau: SDR'
- 324 - Rolling 7-day average of detected COVID-19 cases, (t-i) days ago:  $\text{cases}_{t-i}, \text{cases}_{t-i}'$ ,

325 with  $1 \leq \text{cases}_{t-i} \leq \alpha_{t-i}$ , and  $1 \leq \text{cases}_{t-i}' \leq \alpha_{t-i}$

- 326 - Rolling 7-day average of total number of COVID-19 tests, (t-i) days ago:  $\text{tests}_{t-i}, \text{tests}_{t-i}'$ ,

327 with  $1 \leq \text{tests}_{t-i} \leq \text{population}$ , and  $1 \leq \text{tests}_{t-i}' \leq \text{population}$

328

329

330 Inequality (5) is trivial as the number of actual new cases ( $\alpha_{t-i}$ ) and the entire population of the  
 331 country, or area of interest, are by definition the highest possible values of the product ( $\text{cases}_{t-i} * \text{tests}_{t-i}$ ).  
 332 However, inequality (6) describes a situation where the number of tests can only be equal or greater  
 333 than  $\alpha_{t-i}^2 / \text{cases}_{t-i}$ , and which may increase up to the number of the entire population, causing the  
 334 reduction of the SDR value till its described minimum of  $U/(\alpha_{t-i} * \text{population})$ . Inequality (7), inversely,

335 describes a situation where the number of tests can only be equal or lower than  $\alpha_{t-1}^2/cases_{t-1}$ , and which  
336 may decrease to as low as 1 test, causing the increase of the SDR value to its maximum that equals the  
337 number U.

338 Therefore, because of this demonstrated relationship between the number of daily tests and the  
339 number of actual new infections, we theorize that in a plot of SDR versus the number of daily tests, the  
340 observed plateau is a consequence of the SDR starting to adopt values that are smaller than  $U/\alpha^2$ .  
341 Inversely we observe values outside the plateau as long as SDR adopts values greater than  $U/\alpha^2$ . This is  
342 potentially what happened around the mark of 10,000 tests in our studied example (roughly around  
343 20/8/2020), with the product (cases \* tests) increasing almost 10-fold within a few days and presumably  
344 becoming greater than the square of the actual new cases, thus collapsing the SDR variability into the  
345 observed plateau (Figures 2 & 5). The importance of the plateau being, as previously explained, the  
346 reduction of the metric's variability (i.e., Standard Deviation), enabling a correspondingly robust  
347 forecasting of ICU needs, (t+i) days ahead of each datapoint.

348

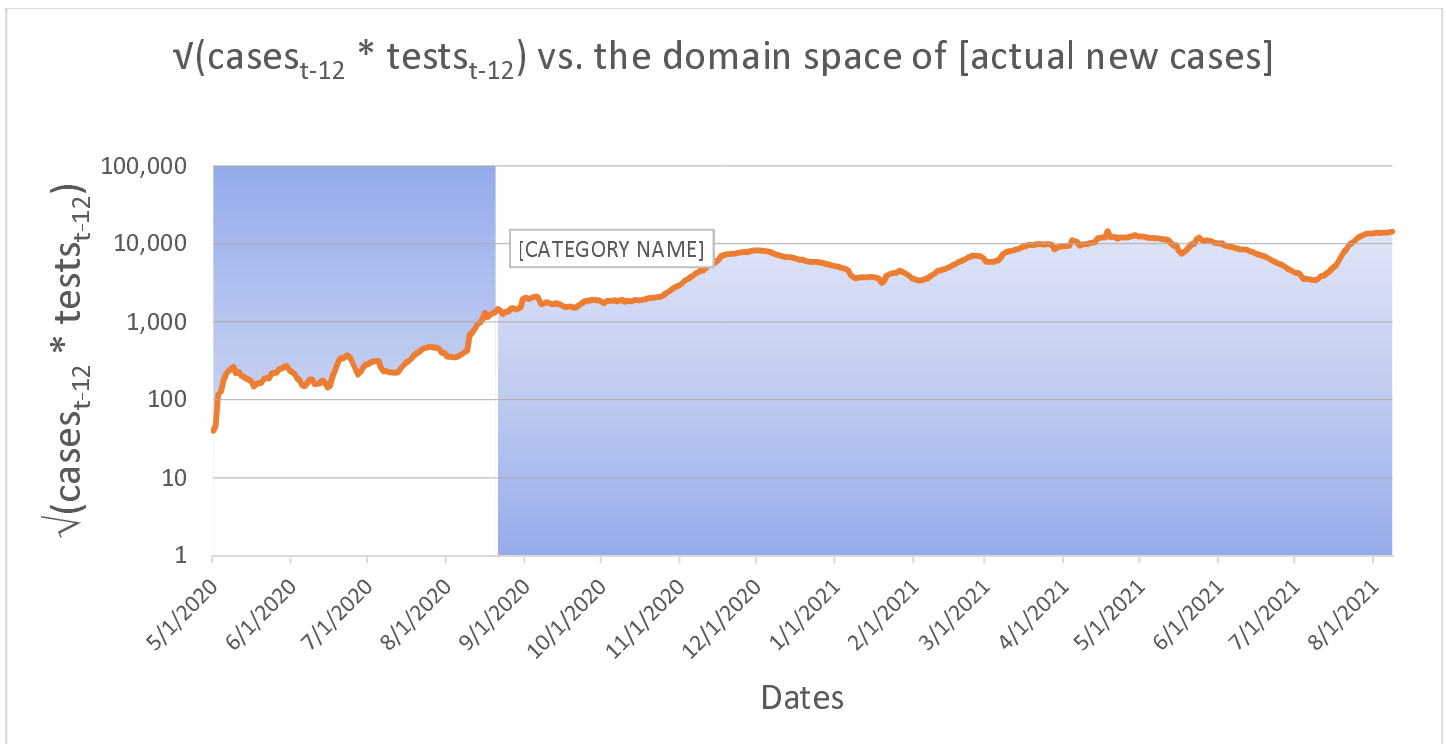



350 **Figure 5.** Visualization of the domain space where the number of actual new cases are to be found  
351 hypothetically (blue area), relatively to the square root of the product [cases<sub>t-12</sub> \* tests<sub>t-12</sub>] (orange line),  
352 before and after the date of 8/20/2020, which marked the beginning of the SDR plateau.

353

354 In the context of the regression analysis of the daily needs for new ICU admissions (U) vs. the  
355 product of [Detected Cases \* Performed Tests] (Figure 3), significant changes in the SDR median would  
356 be reflected as changes in the slope and/or the intercept of the regression line. Specifically, changes in  
357 the slope most likely translate into two possibilities: (A) a change in virulence (*i.e.*, how many individuals  
358 per group of 100 positive cases, per 10,000 tests, are expected to develop very severe COVID-19, given a  
359 theoretical zero regression intercept), or (B) a modification in sampling parameters (*e.g.*, testing more or  
360 fewer asymptomatic persons, or testing a younger subset of the population). Accordingly, a change in  
361 the intercept will likely signify either (a) changes in viral prevalence<sup>7,11</sup>, as the intercept represents a  
362 fixed number U for a theoretical x=0, (*i.e.*, a number of individuals with very severe COVID-19, while no  
363 cases are detected), or (b) changes in testing accuracy<sup>7,11</sup>, with intercept values closer to zero reflecting  
364 optimal accuracy. Rolling 3-weeks regression windows could be employed to detect dynamic changes of  
365 the pandemic. The study of all the available confounding factors (*e.g.*, prevalence of new virus variant,  
366 changes in sampling strategies, changes in testing parameters, characteristics of areas infected,  
367 lockdown and other measures' status, ages of tested and infected individuals, etc.) is required to discern  
368 which exact change is responsible for the observed new disease dynamics, and the SDR derived  
369 regression analysis can provide significant hints as to the direction of the change. In any of the above  
370 cases, an important shift of the SDR would signify an important change in the pandemic parameters,  
371 which in turn would dictate a specific course of action for the authorities, appropriate for each case.

372 In Table 2 we contrast the regression parameters (*i.e.*, slope, intercept and R<sup>2</sup>) against important  
373 factors of the ongoing pandemic, such as, Delta variant prevalence, vaccination levels, and lockdown  
374 periods. What is most notable is the stable slope decrease of the regression equations, over all 6 periods  
375 examined, which is compatible with a decrease in population-level severity/virulence. This is to be  
376 expected, given the long periods of the applied lockdown measures and the ongoing mass vaccination  
377 program in the country (reaching 50% population coverage of fully vaccinated individuals on 8/8/2021).  
378 As presented in the previous paragraph, another factor that can possibly lower the SDR slope is a  
379 significant change in sampling parameters, in a way where the group of asymptomatic individuals that  
380 are being tested becomes considerably increased, a situation that results inherently to fewer detected

381 cases than the group of symptomatic individuals. While it is hard to discern the potential contribution of  
382 each factor with just the publicly available data, it is, nonetheless, possible to calculate a 9.5-fold total  
383 drop in the observed severity between the beginning and ending of the six periods (17/10/2020 ->  
384 8/8/2021), after adjusting for the obvious contribution of the change in the average number of cases  
385 and tests (Table 2):

386  $\Delta(\text{slope, 17/10/2020 -> 8/8/2021}): (2 \cdot 10^{-6} / 7 \cdot 10^{-8}) = 28.6$  - Unadjusted fold change in severity

387  $\Delta(\text{average SDR denominator, 17/10/2020 -> 8/8/2021}): (1,602 \cdot 55,190) / (1,142 \cdot 25,585) = 3$  -  
388 fold change in product (cases \* tests)

389  $\Delta(\text{observed severity, 17/10/2020 -> 8/8/2021}): 28.6 / 3 = 9.5$  - Adjusted fold change in severity

390

391 On the contrary, the intercept oscillates considerably between periods, ranging from +28.6 to -  
392 3.9. As explained previously, increases of the intercept may be attributed to greater viral spread in the  
393 community, as was the case in the second period (11/2/2021 – 21/4/2021), when Athens, the capital,  
394 saw a great increase in infected cases, which signaled the beginning of the 3<sup>rd</sup> wave of the pandemic in  
395 Greece. Besides viral spread, the other factor that influences the intercept is the accuracy of the tests  
396 performed, i.e., potential false positives and false negatives, due to poor test specificity, test sensitivity,  
397 or yet undetectable levels of the virus in asymptomatic infected individuals who simply got tested too  
398 early in the course of the disease. Regarding Delta variant prevalence (B.1.617.2), representing 90% of  
399 cases in Greece on 8/8/2021, it doesn't appear to be affecting the severity of the disease (i.e., a slope  
400 increase), however it is possibly contributing to the intercept increase from 16/6/2021 onwards, with its  
401 greater transmissibility potential, as reported by other studies<sup>18</sup>. Overall, the slope and intercept of SDR-  
402 based regression equations offer an additional layer of information, which, in conjunction with other  
403 metrics and parameters, may create a better understanding of the pandemic's dynamics.

404 We called this new metric Severity Detection Rate, as its representation of the percentage of  
405 very severe COVID-19 outcomes is modulated by the number of tests performed. It is essentially a  
406 standardization of the very severe cases ratio over the infected individuals, with the rate of daily testing.  
407 In other words, the Severity Detection Rate becomes representative of the proportion of people who

408 need ICUs out of the total cases once a sufficient threshold of daily testing rate (hence 'detection rate')  
409 is achieved.

410 As presented in the Methods section, for a more complete examination, we also defined the  
411 percentage of patients who require ICU admission, per new cases detected (t-i) days ago, as ICU Rate  
412 (IR). If, in theory, the total number of tests became equal to the entire population of a country (or the  
413 area of interest), then the SDR metric would be the same as the IR metric, as the 'number of tests'  
414 parameter would be removed from the denominator (as redundant), and both would practically  
415 represent the true percentage of critical patients per infected individual. In order to assess the  
416 predictive potential of the IR metric, we have repeated for IR every piece of analysis that was performed  
417 on the SDR metric throughout this study.

418 Regarding forecasting, the conclusion drawn by this parallel analysis is that the IR metric  
419 performed as well as the SDR metric, in the analyzed example (Figures 3-S, 4-S, Table 2-S). On top of  
420 this, the IR metric would probably have the advantage of simplicity when communicated in the general  
421 public, as it represents a more comprehensible concept: the number of very severe cases per infected  
422 individuals. We therefore believe that the IR metric may be used in cases where the population-level  
423 COVID-19 testing surveillance of the pandemic is well established, by efficient and sufficient testing.  
424 Nonetheless, we support that by including the number of daily tests performed, the SDR metric is  
425 inherently more suitable for a wider range of surveillance scenarios, *e.g.*, when the testing strategies  
426 and pandemic parameters (*e.g.*, number & type of tests, geographical/ occupational/ age targeting,  
427 contact tracing efficacy, transmissibility of the virus, etc.) are more volatile in time. In different  
428 countries, or in specific areas of interest, it is still possible for the IR-based monitoring to fail to return  
429 regression coefficients as strong as in our studied example. In those cases, it would be necessary to  
430 switch to SDR-based monitoring to ensure that a threshold of sufficient testing has been reached (*i.e.*,  
431 plateau formation). In any case, although more studied examples are required to better understand the  
432 potential practical differences between the two metrics, since they both showed equal forecasting  
433 performances, we believe that SDR is the more well-rounded metric, which can be efficiently used in  
434 potentially very diverse situations of pandemic surveillance.

435

436

437

It is made available under a [CC-BY 4.0 International license](#) .

439 **Table 2.** Regression equations per distinct period of stable Severity Detection Rate, with respective average numbers of observed daily needs for  
 440 new ICU admissions, cases detected and tests performed, vaccination coverage at the beginning of each period, percent of Delta variant prevalence  
 441 in cases detected, along with important dates and comments that potentially influenced the course of the pandemic in Greece (each period is color-  
 442 coded with reference to the respective 'distinct periods of testing levels', in Table 1).

443

| Distinct periods of stable Severity Detection Rate |                                                       |                                                                                                                         |                                                                                   |                                                                                                                                         |                                                                                               |                              |
|----------------------------------------------------|-------------------------------------------------------|-------------------------------------------------------------------------------------------------------------------------|-----------------------------------------------------------------------------------|-----------------------------------------------------------------------------------------------------------------------------------------|-----------------------------------------------------------------------------------------------|------------------------------|
|                                                    | 17/10/2020 - 10/2/2021                                | 11/2/2021 - 21/4/2021                                                                                                   | 22/4/2021 - 22/5/2021                                                             | 23/5/2021 - 15/6/2021                                                                                                                   | 16/6/2021 - 6/7/2021                                                                          | 7/7/2021 - 8/8/2021          |
| SDR <sub>12</sub> Regression                       | $2 \cdot 10^{-6}x + 5.7511$                           | $5 \cdot 10^{-7}x + 28.6$                                                                                               | $4 \cdot 10^{-7}x + 25.948$                                                       | $4 \cdot 10^{-7}x - 3.8899$                                                                                                             | $2 \cdot 10^{-7}x + 6.7379$                                                                   | $7 \cdot 10^{-8}x + 5.2217$  |
| SDR <sub>12</sub> R <sup>2</sup>                   | 0.981                                                 | 0.833                                                                                                                   | 0.84                                                                              | 0.962                                                                                                                                   | 0.954                                                                                         | 0.933                        |
| average U (ΔU)                                     | 56 [-]                                                | 69 [+23%]                                                                                                               | 73 [+6%]                                                                          | 34 [-53%]                                                                                                                               | 13 [-62%]                                                                                     | 13 [0%]                      |
| average cases (Δcases)                             | 1,142 [-]                                             | 1847 [+62%]                                                                                                             | 2,453 [+33%]                                                                      | 1887 [-23%]                                                                                                                             | 763 [-60%]                                                                                    | 1602 [+110%]                 |
| average tests (Δtests)                             | 25,585 [-]                                            | 39847 [+56%]                                                                                                            | 49,580 [+24%]                                                                     | 48976 [-1%]                                                                                                                             | 37651 [-23%]                                                                                  | 55190 [+47%]                 |
| Vaccination levels @period start                   | -                                                     | 1/2/2021                                                                                                                | 10/4/2021                                                                         | 11/5/2021                                                                                                                               | 4/6/2021                                                                                      | 25/6/2021                    |
| at least 1-dose [%pop]                             | 0                                                     | 244,652 [2.28%]                                                                                                         | 1,435,513 [13.39%]                                                                | 2,561,871 [23.90%]                                                                                                                      | 3,854,962 [35.96%]                                                                            | 4,678,468 [43.64%]           |
| complete vaccination                               | 0                                                     | 46,295 [0.43%]                                                                                                          | 733,840 [6.85%]                                                                   | 1,335,798 [12.46%]                                                                                                                      | 2,253,347 [21.02%]                                                                            | 3,461,165 [32.29%]           |
| Delta variant prevalence (B.1.617.2)               | -                                                     | -                                                                                                                       | ~0.2% (22/5/21)                                                                   | ~1% (29/5/21)                                                                                                                           | ~5% (12/6/21), ~61% (3/7/21)                                                                  | ~76% (10/7/21) <sup>17</sup> |
| Important dates & comments                         | "2nd wave", national lockdown (7/11/20) <sup>12</sup> | Athens (hosting half of Greece's population) majorly affected, full capital lockdown (9/2/21), "3rd wave" <sup>13</sup> | service workers must perform and report weekly self tests (19/4/21) <sup>14</sup> | lockdown lifted progressively (14/5/21) <sup>15</sup> , all employees must perform and report weekly self-tests (24/5/21) <sup>16</sup> | Indoor dining, amusement parks and other entertainment services reopen (7/6/21) <sup>15</sup> | possible "4th wave"          |

444

445

446

447

448

449

## 450 **Conclusions**

451           Taken together, the monitoring of the Severity Detection Rate and the forecasting of number U  
452 (*i.e.*, daily needs for ICU) should be viewed as integral parts of the currently employed epidemiological  
453 toolbox, *i.e.*, the positivity rate, efficient contact tracing for determination of the basic reproduction  
454 number  $R_0^{19,20}$ , and wastewater-based surveillance<sup>21,22</sup>. The metric introduces the goal for authorities to  
455 minimize its variation by means of a sufficient number of daily tests and an adequate sampling strategy.  
456 Once this goal is achieved, accurate forecasting of daily needs for new ICU admissions becomes possible.  
457 With accurate forecasting, number U becomes in essence a quantitative metric for the severity of the  
458 pandemic.

459           In Figure 6 we detail all the proposed steps for population-level surveillance of COVID-19  
460 pandemic using the Severity Detection Rate metric. For monitoring SDR Standard Deviation, a minimum  
461 of 3-weeks rolling window interval is suggested empirically, as this interval includes the roughly 2-week  
462 lag period between case detection and ICU intubation. The recommended surveillance model provides  
463 three distinct advantages: (1) a measurable threshold for adequacy of tests performed, (2) important  
464 qualitative information regarding the current dynamics of the pandemic (virulence, prevalence, testing  
465 accuracy, etc.) that are reflected by changes in the slope/intercept of the regression analysis, and (3) the  
466 ability to accurately predict the ICU needs, t+I days ahead.

467           We strongly believe that the explicit tracking of this novel metric enhances the visibility of viral  
468 spread and dynamics and may procure an accurate outlook of the upcoming needs for ICU admissions  
469 well in advance, which should serve as an early warning system for COVID-19 health establishments and  
470 resources. We therefore suggest further study of Severity Detection Rate with data from more  
471 countries, as well as at a local level wherever possible, to confirm the proposed functionality and utility  
472 of this metric.

473

474

## Recommended population-level surveillance of COVID-19 pandemic using the Severity Detection Rate (SDR) metric

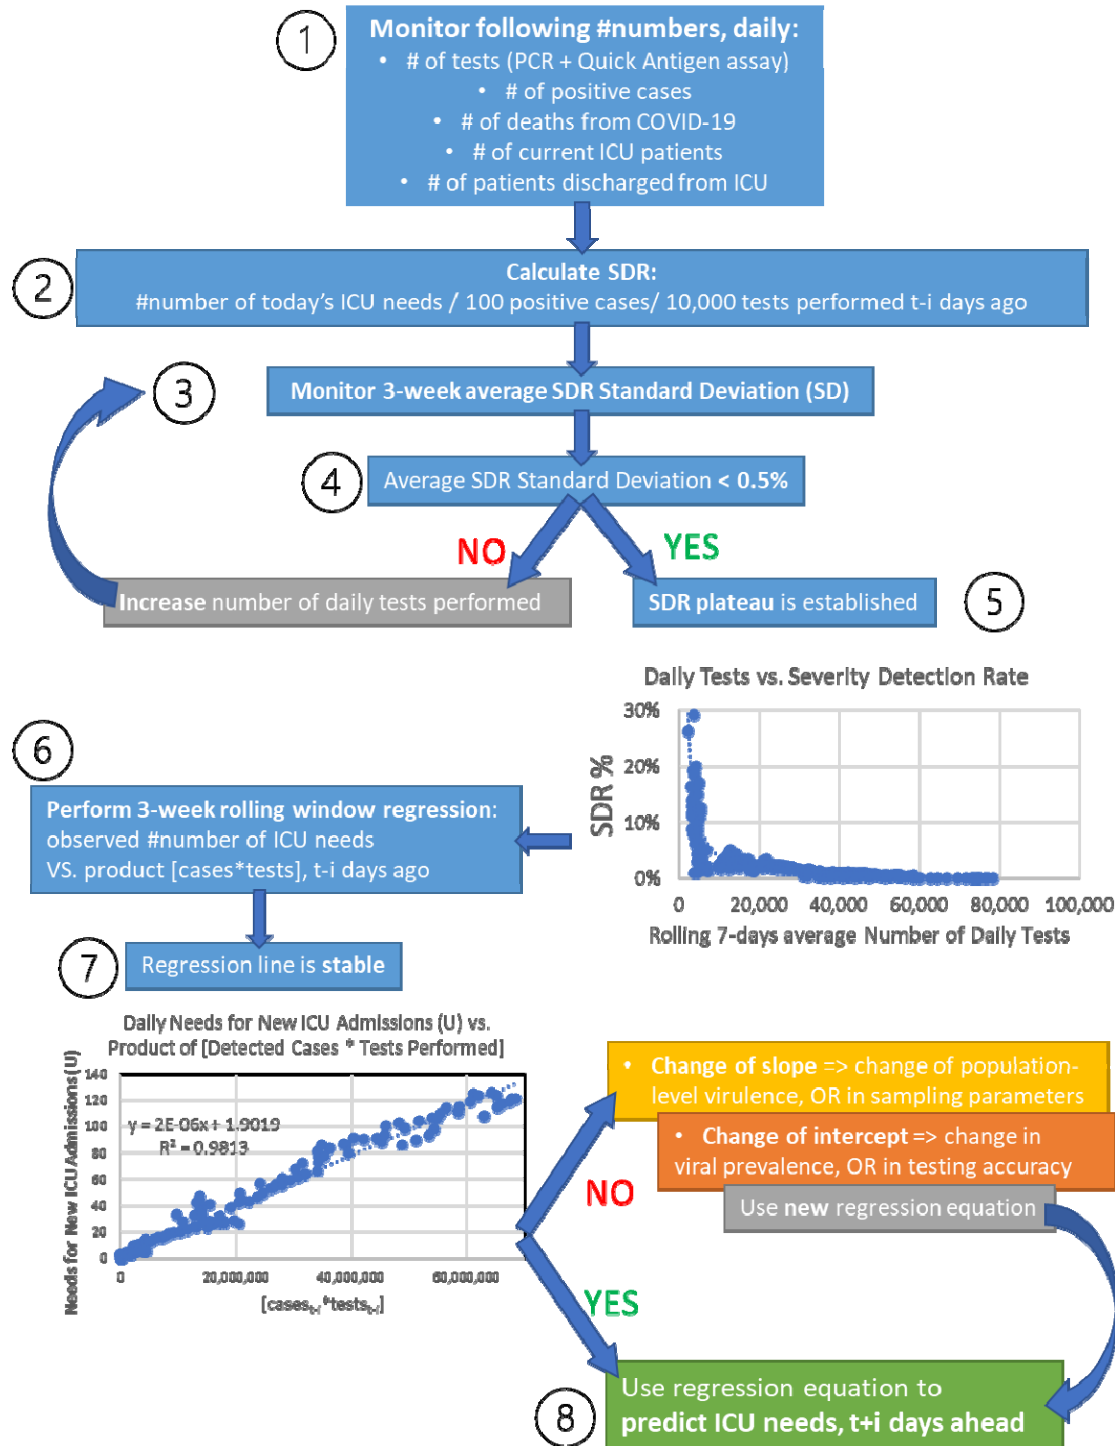

475

476 **Figure 6.** Stepwise schema detailing the logic and requirements for population-level surveillance of

477 COVID-19 pandemic with the use of the Severity Detection Rate metric.

## 478 **References**

- 479 1. Dowdy D, D'Souza G. COVID-19 Testing: Understanding the “Percent Positive”. Johns  
480 Hopkins Bloomberg School of Public Health. Accessed 31 August 2021. Available from:  
481 <https://www.jhsph.edu/covid-19/articles/covid-19-testing-understanding-the-percent-positive.html>
- 482 2. Siddarth D, Katz R, Graeden E, Analytics T, Allen D, Tsai T. 2020. Evidence Roundup: Why  
483 positive test rates need to fall below 3%. Harvard Global Health Institute. Accessed 31 August 2021.  
484 Available from: [https://globalhealth.harvard.edu/evidence-roundup-why-positive-test-rates-need-to-](https://globalhealth.harvard.edu/evidence-roundup-why-positive-test-rates-need-to-fall-below-3)  
485 [fall-below-3](https://globalhealth.harvard.edu/evidence-roundup-why-positive-test-rates-need-to-fall-below-3)
- 486 3. Hellenic National Public Health Organization. Daily Reports COVID-19. Accessed 31  
487 August 2021. Available from: [https://eody.gov.gr/epidimiologika-statistika-dedomena/ektheseis-covid-](https://eody.gov.gr/epidimiologika-statistika-dedomena/ektheseis-covid-19/)  
488 [19/](https://eody.gov.gr/epidimiologika-statistika-dedomena/ektheseis-covid-19/)
- 489 4. Greek Government’s official community on Viber network. Official COVID-19 update.  
490 Accessed 31 August 2021. Available from:  
491 <https://invite.viber.com/?g2=AQAVNiDVlfjrLEtaYLF1s2sUzRrpfLVlflVg4J8wkdNKMUSnUcQWJxnXH0Os1h>  
492 [eH&lang=el](https://invite.viber.com/?g2=AQAVNiDVlfjrLEtaYLF1s2sUzRrpfLVlflVg4J8wkdNKMUSnUcQWJxnXH0Os1h)
- 493 5. Corman VM, Landt O, Kaiser M, Molenkamp R, Meijer A, Chu DKW, Bleicker T, Brünink S,  
494 Schneider J, Schmidt ML, Mulders DGJC, Haagmans BL, van der Veer B, van den Brink S, Wijsman L,  
495 Goderski G, Romette J-L, Ellis J, Zambon M, Peiris M, Goossens H, Reusken C, Koopmans MPG, Drosten  
496 C. 2020. Detection of 2019 novel coronavirus (2019-nCoV) by real-time RT-PCR. Euro Surveill.  
497 25(3):pii=2000045. doi.org: 10.2807/1560-7917.ES.2020.25.3.2000045.
- 498 6. Lambert-Niclot S, Cuffel A, Le Pape S, Vauloup-Fellous C, Morand-Joubert L, Roque-  
499 Afonso AM, Le Goff J, Delaugerre C. 2020. Evaluation of a Rapid Diagnostic Assay for Detection of SARS-  
500 CoV-2 Antigen in Nasopharyngeal Swabs. J Clin Microbiol. 23;58(8):e00977-20. doi: 10.1128/JCM.00977-  
501 20.
- 502 7. Mercer TR, Salit M. 2021. Testing at scale during the COVID-19 pandemic. Nat Rev Genet  
503 22, 415–426. doi: 10.1038/s41576-021-00360-w
- 504 8. Elbe S, Buckland-Merrett G. 2017. Data, disease and diplomacy: GISAID's innovative  
505 contribution to global health. Glob Chall. 10;1(1):33-46. doi: 10.1002/gch2.1018.



- 506 9. Hadfield J, Megill C, Bell SM, Huddleston J, Potter B, Callender C, Sagulenko P, Bedford T,  
507 Neher RA. 2018. Nextstrain: real-time tracking of pathogen evolution. *Bioinformatics* 1;34(23):4121-  
508 4123. doi: 10.1093/bioinformatics/bty407.
- 509 10. Forster P, Forster L, Renfrew C, Forster M. Phylogenetic network analysis of SARS-CoV-2  
510 genomes. 2020. *Proc Natl Acad Sci U S A.* 28;117(17):9241-9243. doi: 10.1073/pnas.2004999117.
- 511 11. Nichols JD, Bogich TL, Howerton E, Bjørnstad ON, Borchering RK, Ferrari M, Haran M,  
512 Jewell J, Pepin KM, Probert WJM, Pulliam JRC, Runge MC, Tildesley M, Viboud C, Shea K. 2021. Strategic  
513 testing approaches for targeted disease monitoring can be used to inform pandemic decision-making.  
514 *PLoS Biol* 19(6): e3001307. doi: 10.1371/journal.pbio.3001307
- 515 12. Krinis N. 2020. Greece to Enter Lockdown to Fight Second Covid-19 Wave. *Greek Travel*  
516 *Pages*. Accessed 31 August 2021. Available from: [https://news.gtp.gr/2020/11/05/greece-enter-](https://news.gtp.gr/2020/11/05/greece-enter-lockdown-fight-second-covid-19-wave)  
517 [lockdown-fight-second-covid-19-wave](https://news.gtp.gr/2020/11/05/greece-enter-lockdown-fight-second-covid-19-wave)
- 518 13. Koutantou A. 2021. Greek premier orders full lockdown in Athens after surge in  
519 coronavirus cases. *Reuters*. Accessed 31 August 2021. Available from:  
520 [https://www.reuters.com/world/greek-premier-orders-full-lockdown-athens-after-surge-coronavirus-](https://www.reuters.com/world/greek-premier-orders-full-lockdown-athens-after-surge-coronavirus-cases-2021-02-09)  
521 [cases-2021-02-09](https://www.reuters.com/world/greek-premier-orders-full-lockdown-athens-after-surge-coronavirus-cases-2021-02-09)
- 522 14. Reuters Staff. 2021. Greece orders COVID self-testing for service workers. *Reuters*.  
523 Accessed 31 August 2021. Available from: [https://www.reuters.com/article/health-coronavirus-greece-](https://www.reuters.com/article/health-coronavirus-greece-tests-idUSL8N2M740B)  
524 [tests-idUSL8N2M740B](https://www.reuters.com/article/health-coronavirus-greece-tests-idUSL8N2M740B)
- 525 15. ESN COVID-19 Official Announcements & News. Timeline for the loosening of the  
526 lockdown measures in Greece. 2021. *Erasmus Student Network Greece*. Accessed 31 August 2021.  
527 Available from: <https://esngreece.gr/covid-19-official-announcements-news>
- 528 16. GTP editing team. 2021. All Employees in Greece Must Self-test for Covid-19. *Greek*  
529 *Travel Pages*. Accessed 31 August 2021. Available from: [https://news.gtp.gr/2021/05/24/all-employees-](https://news.gtp.gr/2021/05/24/all-employees-greece-must-self-test-covid-19)  
530 [greece-must-self-test-covid-19](https://news.gtp.gr/2021/05/24/all-employees-greece-must-self-test-covid-19)
- 531 17. European Centre for Disease Prevention and Control. SARS-CoV-2 variants of concern as  
532 of 26 August 2021. Accessed 31 August 2021. Available from: [https://www.ecdc.europa.eu/en/covid-](https://www.ecdc.europa.eu/en/covid-19/variants-concern)  
533 [19/variants-concern](https://www.ecdc.europa.eu/en/covid-19/variants-concern)

- 534 [18. Centers for disease control and prevention. Delta Variant: What We Know About the](#)  
535 [Science.](#) Accessed 31 August 2021. Available from: [https://www.cdc.gov/coronavirus/2019-](https://www.cdc.gov/coronavirus/2019-ncov/variants/delta-variant.html)  
536 [ncov/variants/delta-variant.html](#)
- 537 19. Macdonald G (1952). The analysis of equilibrium in malaria. *Tropical Diseases Bulletin*.  
538 49 (9): 813–829. ISSN 0041-3240. PMID 12995455.
- 539 20. Delamater PL, Street EJ, Leslie TF, Yang YT, Jacobsen KH. 2019. Complexity of the basic  
540 reproduction number (R0). *Emerg. Infect. Dis.* 25, 1–4.
- 541 21. Wu Y, Guo C, Tang L, Hong Z, Zhou J, Dong X, Yin H, Xiao Q, Tang Y, Qu X, Kuang L, Fang  
542 X, Mishra N, Lu J, Shan H, Jiang G, Huang X. 2020. Prolonged presence of SARS-CoV-2 viral RNA in faecal  
543 samples. *Lancet Gastroenterol Hepatol.* 5(5):434-435. doi: 10.1016/S2468-1253(20)30083-2. Epub 2020  
544 Mar 20.
- 545 22. Polo D, Quintela-Baluja M, Corbishley A, Davey LJ, Andrew CS, David WG, Jesús LR. 2020.  
546 Making waves: Wastewater-based epidemiology for COVID-19 – approaches and challenges for  
547 surveillance and prediction. *Water Research*, 186, 116404. doi: 10.1016/j.watres.2020.116404.
- 548
- 549
- 550
- 551
- 552
